# Supplementary material for: Eco-friendly multivariate curve resolution-alternating least squares and chromatographic quantifications of some veterinary drug residues in pharmaceutical industrial wastewater
Source: Royal Society of Chemistry journal article supplement (doi:10.1039/d0ra08850a), 2021-01-01
Supplement: d0ra08850a1.pdf [file d0ra08850a1.pdf]

"Eco-friendly Multivariate Curve Resolution-Alternating Least Squares and Chromatographic  
Quantifications of Some Veterinary Drug Residues in Pharmaceutical Industrial Wastewater"

**Electronic Supporting Information (ESI)**

**List of tables**

**Table. S1: The concentration matrix used for preparation of the calibration model and validation set of IVM, RFX and SDD.**

| Mixture no. | Calibration model ( $\mu\text{g/mL}$ ) |     |     | Validation set ( $\mu\text{g/mL}$ ) |     |     |
|-------------|----------------------------------------|-----|-----|-------------------------------------|-----|-----|
|             | IVM                                    | RFX | SDD | IVM                                 | RFX | SDD |
| 1           | 5                                      | 5   | 5   | 4                                   | 2   | 2   |
| 2           | 1                                      | 9   | 1   | 8                                   | 4   | 6   |
| 3           | 9                                      | 1   | 1   | 6                                   | 6   | 8   |
| 4           | 3                                      | 9   | 9   | 2                                   | 8   | 2   |
| 5           | 9                                      | 5   | 3   | 4                                   | 2   | 4   |
| 6           | 5                                      | 3   | 9   | 6                                   | 6   | 4   |
| 7           | 3                                      | 1   | 5   | 4                                   | 4   | 6   |
| 8           | 3                                      | 7   | 3   | 2                                   | 8   | 6   |
| 9           | 7                                      | 5   | 3   | 8                                   | 6   | 8   |
| 10          | 9                                      | 9   | 7   | 6                                   | 2   | 2   |
| 11          | 7                                      | 3   | 9   | 2                                   | 2   | 2   |
| 12          | 5                                      | 3   | 7   | 4                                   | 4   | 4   |
| 13          | 3                                      | 7   | 5   | 6                                   | 6   | 6   |
| 14          | 5                                      | 7   | 9   | 8                                   | 8   | 8   |
| 15          | 9                                      | 3   | 7   | 8.5                                 | 8.5 | 8.5 |
| 16          | 3                                      | 3   | 1   |                                     |     |     |
| 17          | 1                                      | 1   | 3   |                                     |     |     |
| 18          | 5                                      | 7   | 9   |                                     |     |     |
| 19          | 3                                      | 1   | 1   |                                     |     |     |
| 20          | 1                                      | 5   | 9   |                                     |     |     |

**Table. S2: System suitability parameters for the proposed TLC-densitometry and HPLC methods.**

| Parameters                                | TLC-densitometry |             |             | Reference value <sup>52</sup>                            | HPLC                 |                       |                      |
|-------------------------------------------|------------------|-------------|-------------|----------------------------------------------------------|----------------------|-----------------------|----------------------|
|                                           | IVM              | RFX         | SDD         |                                                          | IVM                  | RFX                   | SDD                  |
| t <sub>R</sub> (min)                      | -----            | -----       | -----       | -----                                                    | 6.7 ± 0.3            | 2.6 ± 0.2             | 3.7 ± 0.1            |
| R <sub>f</sub> value                      | 0.73 ± 0.03      | 0.28 ± 0.02 | 0.58 ± 0.04 | -----                                                    | -----                | -----                 | -----                |
| Resolution (R <sub>s</sub> ) <sup>a</sup> | 6                | -----       | 3.73        | R <sub>s</sub> > 1.5                                     | 43.04                | -----                 | 15.19                |
| Tailing factor (T)                        | 1                | 1.09        | 1           | T < 2                                                    | 1.09                 | 1                     | 1                    |
| Capacity factor (K)                       | -----            | -----       | -----       | 1-10 acceptable                                          | 5.17                 | 1.37                  | 2.40                 |
| Selectivity factor (α) <sup>a</sup>       | 2.5              | -----       | 2           | α > 1                                                    | 3.76                 | -----                 | 1.75                 |
| No. of theoretical plates (N)             | -----            | -----       | -----       | N ≥ 2000                                                 | 54492.56             | 18048.43              | 43743.40             |
| HETP (mm)                                 | -----            | -----       | -----       | The smaller the value, ↑<br>higher the column efficiency | 4 x 10 <sup>-3</sup> | 13 x 10 <sup>-3</sup> | 4 x 10 <sup>-3</sup> |

<sup>a</sup> The parameters were calculated using RFX as reference

**Table. S3: Analysis of real spiked wastewater samples (spiked with 5 µg/mL of studied drugs standards) by using the proposed methods.**

| Samples <sup>a</sup> | MCR-ALS          |                  |                  |                  |                  |                  | TLC-densitometry |                  |                  |                  |                  |                  | HPLC             |                  |                  |                  |                  |                  |
|----------------------|------------------|------------------|------------------|------------------|------------------|------------------|------------------|------------------|------------------|------------------|------------------|------------------|------------------|------------------|------------------|------------------|------------------|------------------|
|                      | IVM              |                  | RFX              |                  | SDD              |                  | IVM              |                  | RFX              |                  | SDD              |                  | IVM              |                  | RFX              |                  | SDD              |                  |
|                      | T.C <sup>b</sup> | D.R <sup>c</sup> |
| W.W 1                | 11.07            | 6.07             | 4.99             | -----            | 10.88            | 5.88             | 11.00            | 6.00             | 4.99             | ----             | 11.11            | 6.11             | 11.08            | 6.08             | 4.99             | ----             | 11.06            | 6.06             |
| W.W 2                | 10.05            | 5.05             | 4.96             | -----            | 10.16            | 5.16             | 10.00            | 5.00             | 5.04             | ----             | 10.28            | 5.28             | 10.01            | 5.01             | 4.92             | ----             | 10.27            | 5.27             |
| W.W 3                | 12.39            | 7.39             | 10.11            | 5.11             | 10.72            | 5.72             | 12.45            | 7.45             | 10.10            | 5.10             | 10.57            | 5.57             | 12.42            | 7.42             | 10.13            | 5.13             | 10.51            | 5.51             |
| W.W 4                | 9.13             | 4.13             | 11.19            | 6.19             | 4.99             | -----            | 9.07             | 4.07             | 11.10            | 6.10             | 4.998            | ----             | 9.14             | 4.14             | 11.13            | 6.13             | 5.00             | ----             |
| W.W 5                | 10.60            | 5.60             | 4.95             | -----            | 11.30            | 6.30             | 10.67            | 5.67             | 5.00             | ----             | 11.25            | 6.25             | 10.71            | 5.71             | 5.00             | ----             | 11.28            | 6.28             |

<sup>a</sup> Samples are calculated in µg/mL.

<sup>b</sup> Total drug concentration of the spiked sample in µg/mL.

<sup>c</sup> Drug residue in µg/mL after the subtraction of the added standard.

## List of figures

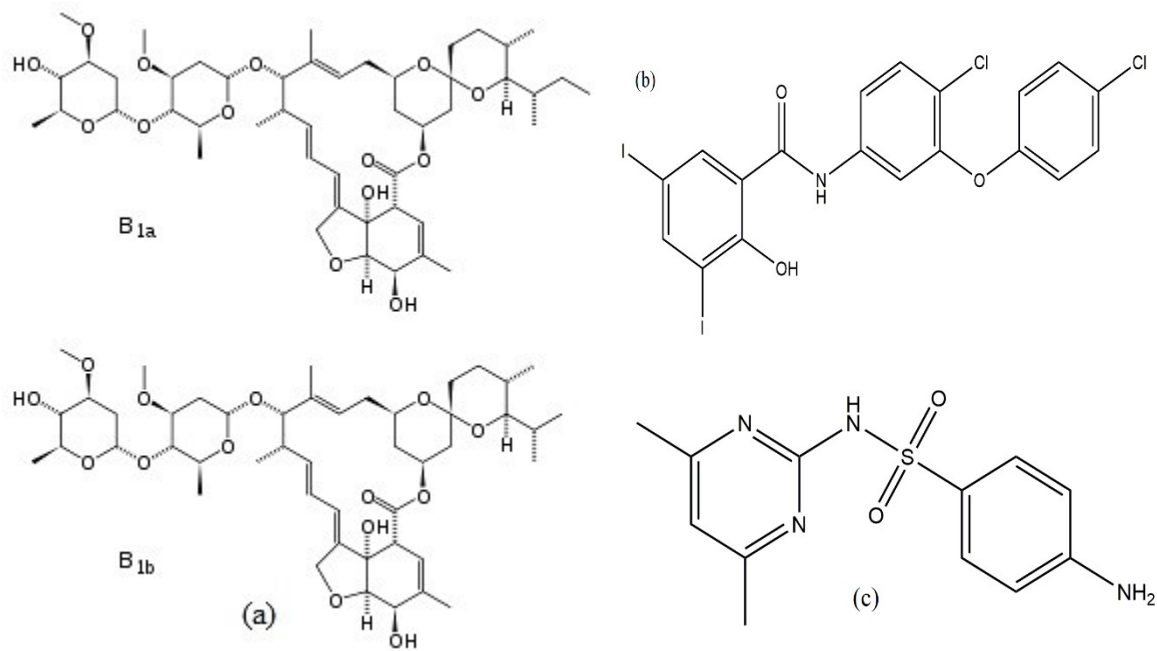

**Figure S1: Chemical structures of (a) IVM, (b) RFX, and (c) SDD**

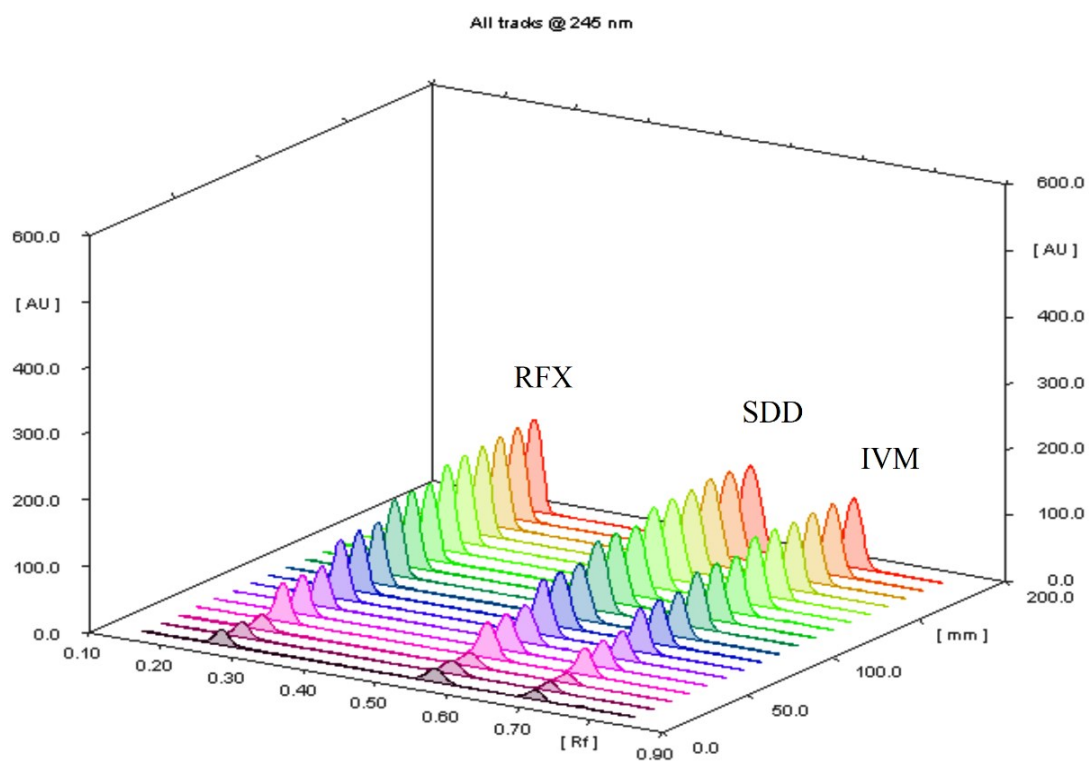

**Figure S2: 3D-TLC densitogram showing linearity range (0.1-1  $\mu\text{g}/\text{band}$ ) of IVM, RFX and SDD.**

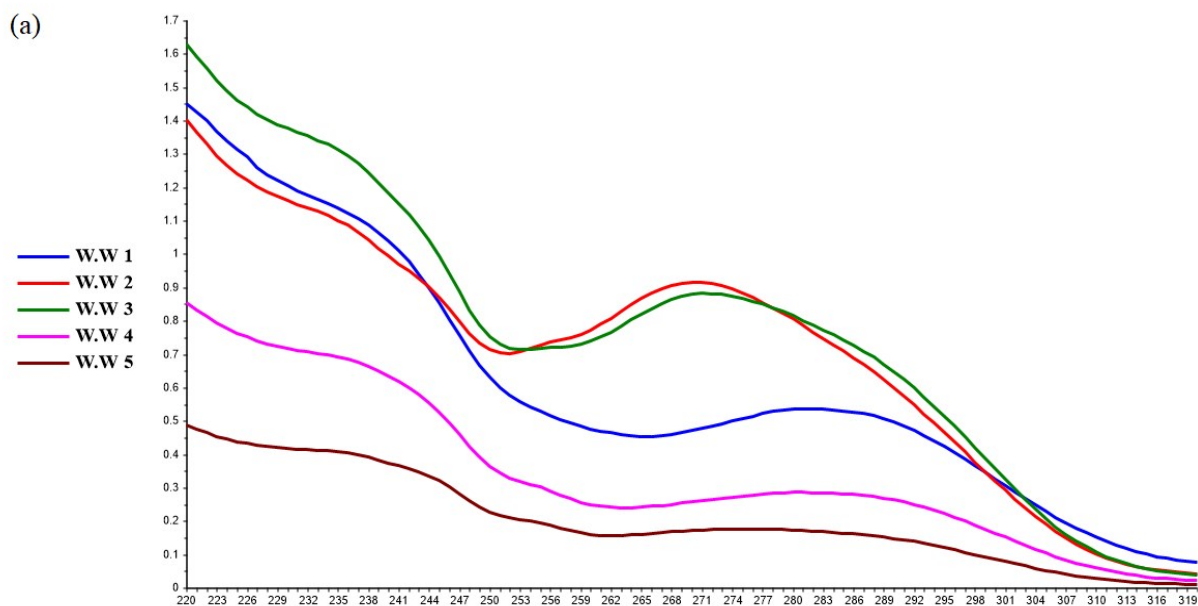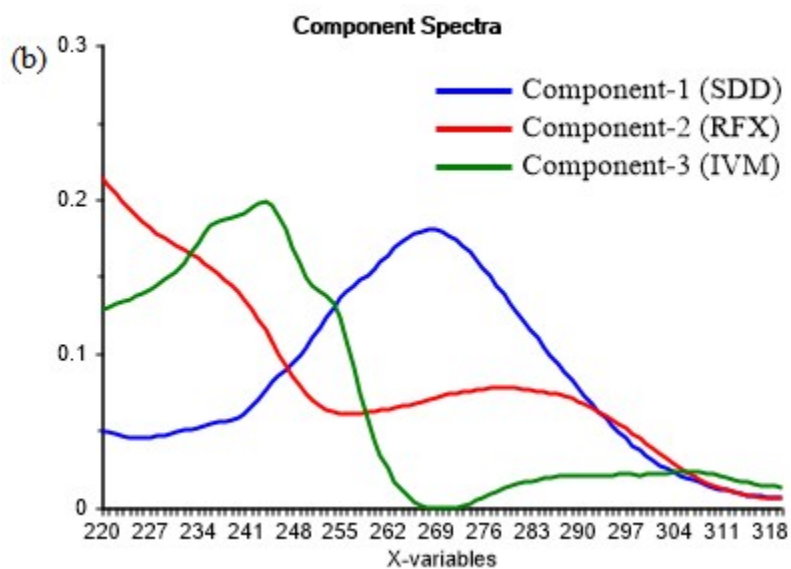

**Figure S3:**

**(a) UV spectra of real industrial wastewater samples after SPE.**

**(b) Resolved MCR-ALS pure spectra profiles of the target pharmaceuticals in wastewater samples.**
